# Supplementary material
Source: PubMed Central journal article supplement (PMC4054221)

1 **HrcT is a key component of the type III secretion system in *Xanthomonas* and also**

2 **regulates the expression of the key *hrp* transcriptional activator HrpX**

3

4 Appl. Environ. Microbiol. Liu et al.

5

6 **Supplementary Materials**

7

8 **Files in This Data Supplement:**

9

10 Supplemental file 1 - Primers used in this study (Table S1); The expression of *hrpG* in the

11 wild-type and *hrcT* mutant of *Xoc* (Fig. S1); Phylogenetic analysis of HrcT proteins from

12 various bacterial pathogens (Fig. S2).

13 **Table S1.** Primers used in this study.

| Primer          | Sequence (5'→3'; restriction sites underscored) | Description of amplified product                                       |
|-----------------|-------------------------------------------------|------------------------------------------------------------------------|
| T-IF            | ATAGGATCCAGCATGGCACCGTCATAG                     | Amplifies a 402-bp fragment targeting left border of <i>hrcT</i>       |
| T-IR            | CCG <u>TCTAGAT</u> CTTTATTGAGACATTC             |                                                                        |
| T-IIF           | ATATCTAGACGGGCGCCCCCATGTGC                      | Amplifies a 750-bp fragment targeting right border of <i>hrcT</i>      |
| T-IIR           | CGGAAGCTTCGTGTGATGAGCCAGAT                      |                                                                        |
| Gm-F            | CCCAAGCTTGGCGCGCCGCACCTACGCTCTCC                | Amplifies a 876-bp ORF encoding Gm <sup>r</sup>                        |
| Gm-R            | CCGGAATTCGGCGCGCCGC GGCGTTGTGACAA               |                                                                        |
| Gm-IF           | CGCGGATCCCGGTGCGGACATTGGGGTGGTT                 |                                                                        |
| Gm-IR           | CCCAAGCTTGAGGTGCAGTGTGGAGAAGATTC                |                                                                        |
| Gm-IIF          | CCGGAATTCGCTTTTAATGGCATGCGGACCTT                | Amplifies 700-bp fragment at left border of <i>hrpB1</i> promoter      |
| Gm-IIR          | ACGCGTCGACTCATCGGCATGAGGGCGCGGAT                |                                                                        |
| <i>phrcT1F</i>  | CGGGGTACCCGGCCGACTTCATCACCAATAACG               | 350-bp T1 promoter of <i>hrpB1</i>                                     |
| <i>phrcT1R</i>  | CCGGAATTCACTGCACCTCGCTTTTAATGGCAT               |                                                                        |
| <i>phrcT2F</i>  | CGGGGTACCGAGCCTGCCTACACCTGGTCGTTG               | 500-bp T2 promoter of <i>hrcT</i>                                      |
| <i>phrcT2R</i>  | CCGGAATTCGGGCGCCCCCATGTGCGGCGCGGT               |                                                                        |
| <i>hrcT-F</i>   | CCGGAATTCATGAACGACGCCACCGATGCCTTG               | Amplifies 831-bp fragment containing <i>hrcT</i> ORF from strain RS105 |
| <i>hrcT-R</i>   | CCCAAGCTTTCAGTGCACGCGCCCGCCTTGCC<br>A           |                                                                        |
| Txac-F          | CCGGAATTCATGAACGACGCCACCGATGCCTT                | 831-bp <i>hrcT</i> ORF from <i>X. axonopodis</i> pv. <i>citri</i> 306  |
| Txac-R          | CCCAAGCTTTCAGTGCACGCGGCTCTCTTGC                 |                                                                        |
| TRs-F           | CCGGAATTCATGGAATCGATCGATAACCGTTGT               | 849-bp <i>hrcT</i> from <i>R. solanacearum</i> GMI1000                 |
| TRs-R           | CCCAAGCTTTCACTGTGGAGTTTTCGCTTTTG                |                                                                        |
| T3000-F         | CCGGAATTCATGCCTCTGGACGCGCAGAATTT                | 795-bp <i>hrcT</i> from <i>P. syringae</i> pv. <i>tomato</i> DC3000    |
| T3000-R         | CCCAAGCTTTCACGGCACCTGCACCACAAAGC                |                                                                        |
| <i>phrcT1gF</i> | CCGGAATTCGGCCGACTTCATCACCAA                     | Amplifies 350-bp promoter of <i>hrpB1</i>                              |
| <i>phrcT1gR</i> | CGGGGTACCACTGCACCTCGCTTTTAAT                    |                                                                        |
| <i>phrcT2gF</i> | CCGGAATTCGAGCCTGCCTACACCTGGTCG                  | Amplifies 500-bp promoter of <i>hrcT</i>                               |
| <i>phrcT2gR</i> | CTGGGTACCCGGGCGCCCCCATGTGCGGCG                  |                                                                        |
| <i>phrpXgF</i>  | CCGGAATTCCTGGATGGCATGAAATGTTCT                  | Amplifies 300-bp promoter region of <i>hrpX</i>                        |
| <i>phrpXgR</i>  | CGGGGTACCCCTGCTCGTATAGGTAGGAAG                  |                                                                        |
| <i>gusF</i>     | GGGGTACCATGTTACGTCCTGTAGAAA                     | Amplifies 1,830-bp fragment containing <i>gusA</i>                     |
| <i>gusR</i>     | CGGGATCCTCATTGTTTGCCTCCCTGC                     |                                                                        |
| T-F             | CCGGAATTCATGGACAGTCTTCCCGGAAT                   | A 711-bp fragment of <i>hrcT</i> fused with 6×his tag                  |
| T-hisR          | CCGCTCGAGGTGGTGGTGGTGGTGGTGGCAGC                |                                                                        |

|                |                                    |                                       |
|----------------|------------------------------------|---------------------------------------|
|                | CGCCC GCCTT GCCAC                  |                                       |
| O-F            | CATGGCTACATGCTGACAGCCTA            | Nested primers for                    |
| I-F            | CGCGGATCCACAGCCTACTGATGATGATCAGTAC | 5'-RACE                               |
|                | ATG                                |                                       |
| <i>hrcTO-R</i> | ATCGTGCAATTGCTGCTGGAAATGC          | Nested gene-specific                  |
| <i>hrcTI-R</i> | CGATCGCAAGATCCACCAGCACAA           | primers for 5'-RACE of                |
|                |                                    | <i>hrcT</i>                           |
| 1-2-F          | GAGGTTGAAGCCGACCATGGTCAGCTCGT      | Amplified 800-bp fragment             |
| 1-2-R          | TGTCCCGGGTTCGGTTCGTGAGTGGGCTCAT    | between <i>hrpB1</i> and <i>hrpB2</i> |
| 2-J-F          | AAACACAACGTCACCACACACCCGACC        | Amplified 872-bp fragment             |
| 2-J-R          | TCGATGTGCAGAACGATGGCGTGCGCA        | between <i>hrpB2</i> and <i>hrcJ</i>  |
| J-4-F          | ATCAGGACATTGGCCAATCGCGCGGGCA       | Amplified 909-bp fragment             |
| J-4-R          | GACGCGTCCAAAGTCACGCCAGACGAC        | between <i>hrcJ</i> and <i>hrpB4</i>  |
| 4-5-F          | CGCAGACTGCGCAGCTGATCGCGCAGAT       | Amplified 1100-bp                     |
| 4-5-R          | GGTAATCCAGGCGTGGTCGGGATGGTC        | fragment between <i>hrpB4</i>         |
|                |                                    | and <i>hrpB5</i>                      |
| 5-N-F          | TCATCAGGCCATCCACGATGCGCACGCCGGTC   | Amplified 583-bp fragment             |
| 5-N-R          | GCGTGTGCGAATGGGATACGGGCGTGTTCGAG   | between <i>hrpB5</i> and <i>hrcN</i>  |
| N-7-F          | ACGGTGCGGAAGTGTTTCATGCTGCAGGATCGT  | Amplified 610-bp fragment             |
| N-7-R          | CGATCCGATTGCCGAGGAAGTGCGCGGCATCC   | between <i>hrcN</i> and <i>hrpB7</i>  |
| 7-T-F          | TCAGTGCGACGCGCCCGCCTTGCCACCCAGGT   | Amplified 1337-bp                     |
| 7-T-R          | ATGCGTGAGCCTGCCTACACCTGGTCGTTGCT   | fragment between <i>hrpB7</i>         |
|                |                                    | and <i>hrcT</i>                       |
| T-C-F          | TGTGTTGGAGGAGCCACCGCCGATTGGCTGTA   | Amplified 1014-bp                     |
| T-C-R          | GACAAGCTCGAACCGTCTGAACTTGAGTCAGCC  | fragment between <i>hrcT</i>          |
|                |                                    | and <i>hrcC</i>                       |
| N-T-F          | ATCGTGCAATTGCTGCTGGAAATGCAGGAA     | Amplified 2717-bp                     |
| N-T-R          | ATGGGATACGGGCGTGTTCGAGACCGATCT     | fragment between <i>hrcN</i>          |
|                |                                    | and <i>hrcT</i>                       |
| B7-T           | ATGCGTGAGCCTGCCTACACCTGGTCGTTGCT   | <i>hrpB7</i> gene, 510-bp             |
| B7-R           | CAGCGCGACCAGTGTCTCGATCGCGTCTTCTT   |                                       |
| T-F            | ATGAACGACGCCACCGATGCCTTGCTGGCCCT   | <i>hrcT</i> gene, 831-bp              |
| T-R            | TCAGTGCGACGCGCCCGCCTTGCCACCCAGGT   |                                       |
| hpa2-F         | AGCAGAATCGAATGAATGGCATGCG          | <i>hpa2</i> gene fragment,            |
| hpa2-R         | CGTGCGTCAGTGTGTATGTAGCAGC          | 145bp                                 |
| hpa1-F         | CCAGGGTATCTCGGAAAAGCAACTG          | <i>hpa1</i> gene fragment, 187bp      |
| hpa1-R         | ATTCATCAGCATCTGGGTGAGTGCC          |                                       |
| hrpB1-F        | TGCTGACGATTCAACCGGTACGTCC          | <i>hrpB1</i> gene fragment,           |
| hrpB1-R        | GGCTGATCGAAGAAGACGCCGATGC          | 110bp                                 |
| hrcU-F         | GAGACACCGCTTGATATTGCC              | <i>hrcU</i> gene fragment, 180        |
| hrcU-R         | GCCCTCGCTTTCCTTGATTC               | bp                                    |
| hrpE-F         | CTTCGAACAGGGTATGGATGG              | <i>hrpE</i> gene fragment, 162        |
| hrpE-R         | TTGAGCTGCGTGATCTTGTTG              | bp                                    |
| hpa4-F         | CTGGCTTGAGCAACAAGGTATTGAG          | <i>hpa4</i> gene fragment, 187        |

---

|        |                                   |                                |
|--------|-----------------------------------|--------------------------------|
| hpa4-R | GAGCCAGATCCACCACCGGTCATTC         | bp                             |
| hpa3-F | TTGGGTTACCTGGTGAGCTTG             | <i>hpa3</i> gene fragment, 215 |
| hpa3-R | CCAGCCATACTCGGTCAGCAG             | bp                             |
| gyrB-F | CGGCACTTACGACTCCAGCAAG            | <i>gyrB</i> gene fragment,     |
| gyrB-R | CGACCAGGATTTTCACCACGATG           | 191bp                          |
| pXF    | CCCAAGCTTCCGGATGGCATGAAATGTTCTGT  | Amplifies 300-bp promoter      |
| pXR    | CTAGTCTAGACCTGCTCGTATAGGTAGGAAGA  | region of <i>hrpX</i>          |
| TF     | CCCAAGCTTATGAACGACGCCACCGATGCCTT  | <i>hrcT</i> gene, 831-bp       |
| TR     | CTAGTCTAGATCACAGATCTTCTTCAGAAATAA |                                |

---

15 **Fig. S1** The expression of *hrpG* in the wild-type and *hrcT* mutant of *Xoc*. A. pGGUS-mediated  
16 glucuronidase activity in RS105 and  $R\Delta hrcT$ . Strains were incubated in XOM3 medium for 12 h  
17 at 28°C. GUS activity was determined by measuring the OD<sub>600</sub> at 415 nm using 4-MUG as a  
18 substrate. B. Expression analysis of *hrpG* by real-time qRT-PCR. RNAs were isolated from  
19 cultures of RS105 and  $R\Delta hrcT$ . All strains were grown in XOM3 for 12 h at 28°C, and relative  
20 mRNA levels were calculated with respect to the expression level of the corresponding  
21 transcript in RS105. The different columns above were measured by a paired, two-tailed  
22 Student *t*-test ( $P \leq 0.05$ ) relative to the wild-type. The experiments were repeated three times  
23 and similar results were obtained.

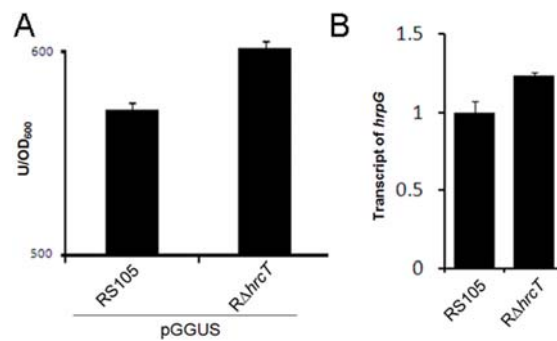

24 **Fig. S2** Phylogenetic analysis of HrcT proteins from various bacterial pathogens. HrcT from  
 25 *Xoc* RS105 was compared with related HrcT proteins from *Xoc* BLS256, *X. campestris* pv.  
 26 *vesicatoria* Xcv85-10, *X. axonopodis* pv. *citri* Xac 306, *X. oryzae* pv. *oryzae* PXO99<sup>A</sup>, *X.*  
 27 *campestris* pv. *campestris* Xcc8004, *A. citrulli*, *R. solanacearum* GMI1000, *Burkholderia* sp., *P.*  
 28 *syringae* pv. *tomato* DC3000, *E. amylovora*, *D. dadantii* 3937, *S. boydii*, *S. enterica* and *Y.*  
 29 *pseudotuberculosis*. The protein IDs were provided before the pathogen names. The analysis  
 30 was used performed using MEGA 4 software.

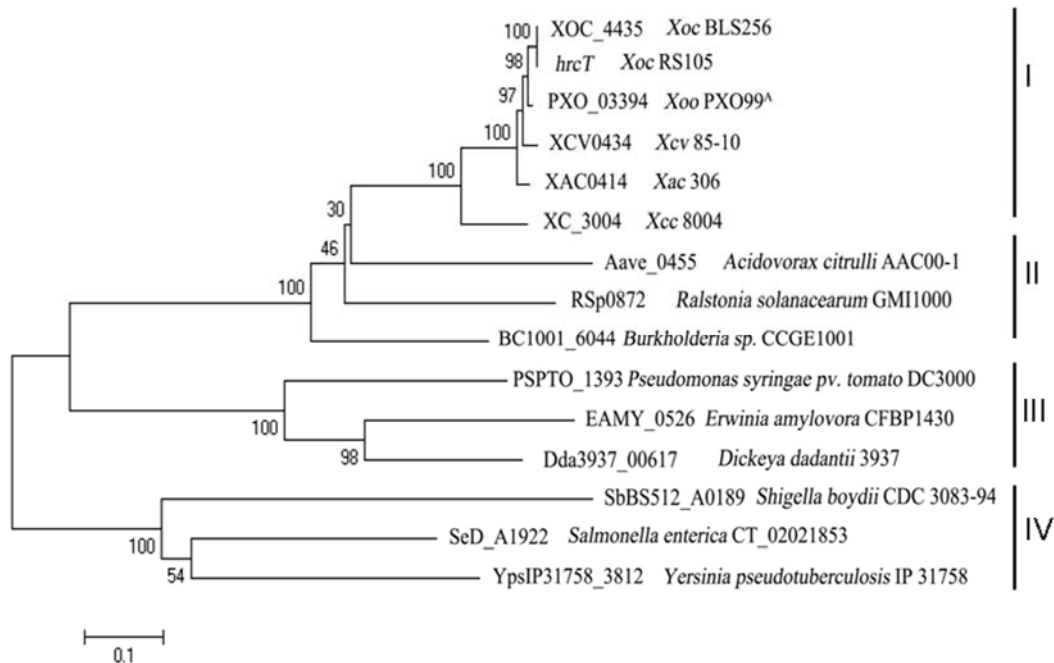

Supplement: AEM.00308-14_zam999105452so1.pdf [file AEM.00308-14_zam999105452so1.pdf]
